# INHERITANCE OF FERTILITY IN THE LATERAL SPIKELETS OF BARLEY<sup>1</sup>

WARREN H. LEONARD

Colorado Experiment Station, Ft. Collins, Colorado

Received October 13, 1941

## INTRODUCTION

A STUDY was made of the inheritance of fertility in the lateral spikelets of the cultivated barley species in an attempt to explain some of the differences in fertility known to exist in certain crosses between species.

Four species of cultivated barley have been recognized by HARLAN (1918) on the basis of the fertility of the lateral spikelets, these being *Hordeum vulgare*, *H. intermedium*, *H. distichon*, and *H. deficiens*. *H. vulgare* and *H. intermedium* are so-called 6-rowed species with all spikelets at a rachis joint at least partially fertile, the latter species being different from the former in that the lateral spikelets are only partially fertile or, when fully fertile, without awns or hoods. *H. distichon* and *H. deficiens* are so-called 2-rowed species with no fertility of the lateral spikelets. The side spikelets consist of glumes, lemma, palea, rachilla, and usually the rudiments of the sexual organs in *H. distichon*; but they are reduced in *H. deficiens* to only the glumes and rachilla with rarely more than one flowering bract (lemma or palea) and never the rudiments of sexual organs.

It has been observed that some crosses give intermediums<sup>2</sup> which have fertile lateral spikelets, while others give only segregates with infertile lateral spikelets. There is a possibility that some factor or factors other than those for non-6-row versus 6-row (*Vv*) and for intermedium versus non-intermedium (*Ii*) are necessary to explain the difference in behavior between fertile and infertile intermediums.

<sup>1</sup> This material was taken from a thesis presented to the faculty of the Graduate School of the UNIVERSITY OF MINNESOTA in partial fulfillment of the requirements for the degree of Doctor of Philosophy.

The writer wishes to express his appreciation to DR. F. R. IMMER, Professor of Agronomy and Plant Genetics, UNIVERSITY OF MINNESOTA, for his many suggestions. This study was made under his direction. Credit is due DR. D. W. ROBERTSON, Agronomist, COLORADO EXPERIMENT STATION, for advice and guidance on many details involved in this investigation. The writer also wishes to express his appreciation to DR. H. K. HAYES, Professor of Agronomy and Plant Genetics, UNIVERSITY OF MINNESOTA, for his constructive criticism of the manuscript.

The data were all obtained at the COLORADO EXPERIMENT STATION at Fort Collins. Published with the approval of the Director of the Experiment Station as Scientific Series Paper No. 125.

<sup>2</sup> Both intermediums and intermediates may have partial lateral spikelet fertility. Intermediums (*VVII*) are distinguishable phenotypically by the rounded lemmas of the lateral florets which are never awn-pointed. Fertile intermediums are genetically *VV* with partial fertility of the lateral spikelets. Infertile intermediums (*VVII*) are designated as forms with rounded lemmas with less than two per cent of the lateral spikelets fertile. Ordinarily, there is no fertility of the lateral spikelets.

## LITERATURE REVIEW

Previous research in barley genetics has been reviewed rather extensively by several investigators: GRIFFEE (1925), HAYES and GARBER (1927), ROBERTSON (1929), BUCKLEY (1930), KUCKUCK (1930a), and DAANE (1931). In addition, a bibliography on genetic factors has been compiled by ROBERTSON, WIEBE and IMMER (1941). Consequently the work reviewed here will be that which pertains particularly to the inheritance of fertility of the lateral spikelets.

A single-factor difference has been found between crosses of *Hordeum vulgare* and *H. distichon*, *H. vulgare* and *H. deficiens*, and *H. distichon* and *H. deficiens*. They have been considered as an allelic series by ENGLEDDOW (1924) and by HOR (1924). The intermedium versus non-intermedium (*Ii*) factor pair was found by HARLAN and HAYES (1920) and by ROBERTSON (1929, 1933) to be independent of the non-6-row versus 6-row (*Vv*) factor pair.

Two distinct types of inheritance have been obtained from crossing varieties of *H. distichon* and *H. deficiens*, both 2-rowed species, with varieties of *H. vulgare*. These types of inheritance will be described in some detail.

Many workers (ROBERTSON, et al. 1941) have obtained three classes from crosses of *H. vulgare* and *H. distichon* varieties. An intermediate<sup>3</sup> condition was found to exist in the  $F_1$  generation with the lateral spikelets awned (or hooded) and high in fertility. The  $F_2$  segregation has been readily explained as a single-factor difference with a 1:2:1 ratio of 6-rowed intermediate, and 2-rowed forms.

That more than three classes for fertility and rows could be separated in  $F_2$  generations of 6-row  $\times$  2-row crosses was pointed out by ENGLEDDOW (1920), followed shortly afterwards by a complete genetical analysis by HARLAN and HAYES (1920). The latter gave their results for a cross between Manchuria, a 6-rowed barley, and Svanhals, a 2-rowed *H. distichon* variety. They obtained an  $F_1$  with lateral spikelets slightly fruitful and with intermediate awns. The  $F_2$  genotypes were classified into seven classes on the basis of their  $F_3$  behavior. GRIFFEE (1925) found a similar condition in a Svanhals  $\times$  Lion cross. ROBERTSON (1933) obtained similar results in a cross between Colsess and *H. deficiens nudideficiens*. The data have been explained on a two-factor basis—that is, intermediums versus non-intermediums (*Ii*) and non-6-row versus 6-row (*Vv*), with the intermedium factor pair (*Ii*) hypostatic to that for rows (*Vv*). The  $F_2$  genotypes as determined by  $F_3$  behavior are as follows:

<sup>3</sup> The term "intermediate" is used throughout this paper to designate the heterozygous condition of the non-6-row versus 6-row (*Vv*) factor pair. An intermediate may carry the genes *Ii*, *Ii*, *ii*, or any allele of this series.

| CLASS | CLASSES WHICH SEGREGATE IN F <sub>3</sub>  | F <sub>2</sub> GENOTYPE                  | RATIO |
|-------|--------------------------------------------|------------------------------------------|-------|
| 1     | 6-row                                      | <i>vvII</i><br><i>vvIi</i><br><i>vvi</i> | 4     |
| 2     | 6-row, intermediate, and intermedium       | <i>VvII</i>                              | 2     |
| 3     | 6-row, intermediate, intermedium and 2-row | <i>VvIi</i>                              | 4     |
| 4     | 6-row, intermediate, and 2-row             | <i>Vvii</i>                              | 2     |
| 5     | Intermedium                                | <i>VVII</i>                              | 1     |
| 6     | Intermedium and 2-row                      | <i>VVIi</i>                              | 2     |
| 7     | 2-row                                      | <i>VVii</i>                              | 1     |

That fertility of the lateral spikelets might be further influenced by minor modifying factors has been suggested by NEATBY (1929) and by HARLAN and HAYES (1920). GILLIS (1926) believes that a third factor pair (*Dd*) also is involved in fertility, being *D* in the intermediate forms and *d* in the *H. deficiens* types.

There is a possibility that some 2-rowed varieties of *H. distichon* really belong to the *H. intermedium* group genetically. This has long been suspected by HARLAN and MARTINI (1935) on the basis of extensive observations. They found occasional fertile lateral spikelets in 44 out of 408 supposedly normal 2-rowed varieties, or a total of 11 percent. Fertile lateral spikelets were especially plentiful in hybrid varieties and were much more common among dense-eared than among lax-eared barleys. These workers feel that different levels of fertility are correlated with a vigor of plant growth that may be significant. ENGLEDDOW (1924) is also of the opinion that environment may influence fertility somewhat. In *H. intermedium haxtoni*, lateral floret fertility was influenced by time of planting, being much higher when planted early.

LINKAGE GROUPS IN BARLEY

Seven linkage groups have been established in barley. The literature on these groups has been reviewed by KUCKUCK (1930a, 1930b), DAANE (1931), ROBERTSON (1933, 1937, 1939), ROBERTSON, DEMING, and KOONCE (1932), and by ROBERTSON, WIEBE, and IMMER (1941). Since there are seven haploid chromosomes in cultivated barley, all linkage groups are thought to be found. As will be shown later, the factors concerned in this study are probably located in group IV. The factor pair for hoods versus awns (*Kk*) is located in this group. ROBERTSON (1933) found the factor pair for intermedium versus non-intermedium (*Ii*) to be linked with hoods versus awns (*Kk*) with  $15.12 \pm 0.065$  percent recombination.

MATERIALS AND METHODS

This study on the inheritance of fertility of the lateral spikelets of barley

was made at the COLORADO EXPERIMENT STATION during the years 1931 to 1940, inclusive.

*Symbols for genetic characters*

The special fertility condition found in Mortoni involves the factor pair for non-6-row versus 6-row (*Vv*), but it must also be discussed in relation to the factor pair for intermedium versus non-intermedium (*Ii*). The genetic characters used in various crosses, together with their symbols, are listed below. The standard nomenclature suggested by ROBERTSON, WIEBE, and IMMER (1941) has been followed.

| LINKAGE GROUP | CHARACTER PAIR                                | SYMBOLS     |
|---------------|-----------------------------------------------|-------------|
| I             | 2-row versus non-2-row                        | <i>Vv</i>   |
|               | Green versus chlorina seedling color          | <i>Ff</i>   |
| II            | Black versus white floral bracts              | <i>Bb</i>   |
| III           | Covered versus naked caryopsis                | <i>Nn</i>   |
| IV            | Hoods versus awns                             | <i>Kk</i>   |
|               | Intermedium versus non-intermedium (or 2-row) | <i>Ii</i>   |
| V             | Long versus short-haired rachillas            | <i>Ss</i>   |
| VI            | Green versus xantha seedling color            | <i>Xsxs</i> |

*Description of varieties used in experiments*

The strains used in this experiment were as follows: Nudihaxtoni, Mortoni, Coast II, Smyrna I, Minnesota 84-7, Nilsson-Ehle No. 2, Nudideficiens, Nigrinudum, and Sublaxum. These varieties were made available by either the COLORADO EXPERIMENT STATION or the U. S. DEPARTMENT OF AGRICULTURE. Minnesota 84-7 came from the MINNESOTA AGRICULTURAL EXPERIMENT STATION.

*H. intermedium nudihaxtoni* (C.I. No. 2231) is an intermedium variety with complete fertility of the lateral spikelets. It is a naked barley with white kernels and floral bracts. The lemmas of the central spikelets are long-awned while those of the lateral spikelets are awnless.

*H. intermedium mortoni* (C.I. No. 2210) is a black, awned, covered variety with short-haired rachillas and purple plant color. It is a fertile intermedium with partial fertility of the lateral spikelets on practically every spike. (See fig. 1.) A count of the fertile and infertile lateral spikelets was made on the heads of seven parent plants used in crosses. From 32.2 to 51.2 percent of the lateral spikelets were fertile, the average being 40.7 percent.

The other varieties used in crosses generally were genetic testers. Except for Sublaxum, these strains have been described by previous workers (ROBERTSON 1929, 1933, 1937; ROBERTSON, DEMING, and KOONCE 1932). The factorial composition of the various parent lines is listed in table 1.

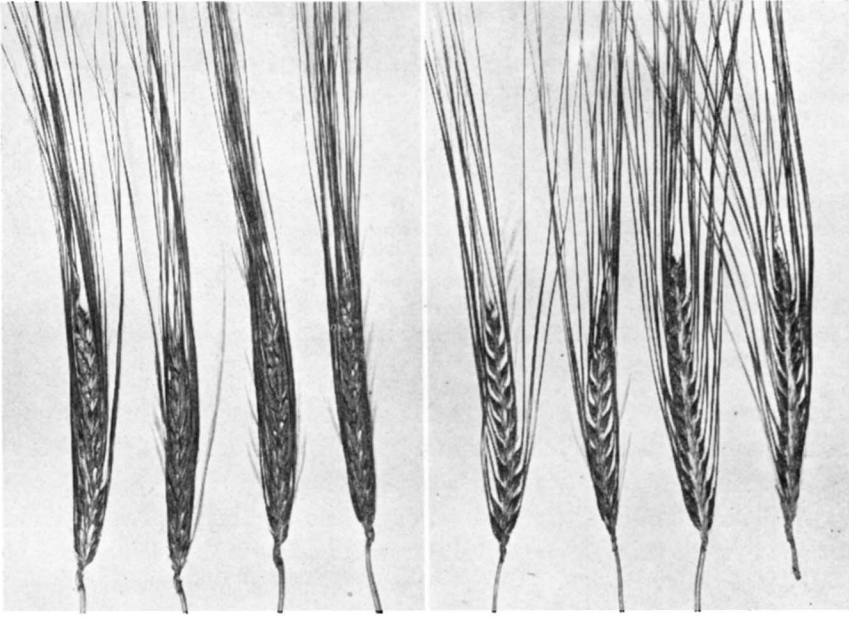

FIGURE 1 (left).—Heads of the Mortoni Parent. The partial fertility of the lateral spikelets is evident.

FIGURE 2 (right).—Classes in the  $F_2$  generation of a Mortoni  $\times$  Nigrinudum cross. The two heads on the left are infertile intermediaries, the third head is a fertile intermedium, while the fourth is the type with inflated lateral spikelets classified as fertile.

### *Experimental methods*

The experimental methods used were similar to those followed by ROBERTSON (1929). Particular attention has been given to the nature of fertility in the lateral spikelets. Three reciprocal crosses were made in each instance with the progeny carried to the  $F_3$  generation. In the  $F_2$  generation the plants were separated for the various character pairs being analyzed. Because of the difficulty in the separation of some of the classes, it was necessary in many cases to carry a random sample of the  $F_2$  plants to the  $F_3$  generation to determine the  $F_2$  genotypes. A few heads were threshed from each  $F_2$  plant, the seed of which was planted in individual 8-foot rows for the  $F_3$  segregation.

The observed data were compared to calculated theoretical ratios and tested for goodness of fit by the use of  $\chi^2$  where two or more phenotypic

TABLE I  
List of the factor pairs found in the different parents.

| VARIETY             | SYMBOLS FOR CHARACTERS |           |           |           |           |           |           |             |
|---------------------|------------------------|-----------|-----------|-----------|-----------|-----------|-----------|-------------|
|                     | <i>Vv</i>              | <i>Ff</i> | <i>Bb</i> | <i>Nn</i> | <i>Kk</i> | <i>Ii</i> | <i>Ss</i> | <i>XsXs</i> |
| Coast II*           | <i>vv</i>              | <i>FF</i> | <i>bb</i> | <i>NN</i> | <i>kk</i> | <i>Ii</i> | <i>ss</i> | <i>XsXs</i> |
| Minnesota 84-7      | <i>vv</i>              | <i>ff</i> | <i>bb</i> | <i>NN</i> | <i>kk</i> | —         | <i>SS</i> | <i>XsXs</i> |
| Nilsson-Ehle No. 2† | <i>VV</i>              | <i>FF</i> | <i>bb</i> | —         | <i>kk</i> | <i>ii</i> | —         | <i>XsXs</i> |
| Smyrna I            | <i>VV</i>              | <i>FF</i> | <i>bb</i> | —         | <i>kk</i> | <i>ii</i> | —         | <i>XsXs</i> |
| Nudihaxtoni         | <i>vv</i>              | <i>FF</i> | <i>bb</i> | <i>nn</i> | <i>kk</i> | <i>Ii</i> | <i>SS</i> | <i>XsXs</i> |
| Mortoni             | <i>VV</i>              | <i>FF</i> | <i>BB</i> | <i>NN</i> | <i>kk</i> | —         | <i>ss</i> | <i>XsXs</i> |
| Sublaxum            | <i>VV</i>              | <i>FF</i> | <i>bb</i> | <i>nn</i> | <i>KK</i> | <i>ii</i> | —         | <i>XsXs</i> |
| Nudideficiens       | <i>VV</i>              | <i>FF</i> | <i>bb</i> | <i>nn</i> | <i>kk</i> | <i>ii</i> | <i>SS</i> | <i>XsXs</i> |
| Nigrinudum          | <i>VV</i>              | <i>FF</i> | <i>BB</i> | <i>nn</i> | <i>kk</i> | <i>Ii</i> | <i>ss</i> | <i>XsXs</i> |

\* Coast II is heterozygous for green versus white seedlings (*Ac2 ac2*).

† Nilsson-Ehle No. 2 is heterozygous for albino seedlings (*A2a2*). These factor pairs segregated for 3:1 ratio in each case. Since they were not used in linkage relations, they will not be discussed further.

classes were involved. The interpretation of the significance of  $\chi^2$  values was the same as that used by FISHER (1934). The formula applied for the computation of  $\chi^2$  for a 3:1 ratio was as follows:  $\chi^2 = (A - 3a)^2 / 3N$  where  $A$  = the observed number in the dominant class,  $a$  = the observed number in the recessive class, and  $N$  = the total number of individuals. The probability value for one degree of freedom was determined by reference to a normal probability integral table.

The linkage determinations from  $F_2$  data were made by the use of the product formula. The recombination percentages, as well as their standard errors, were determined from tables prepared by IMMER (1930). The  $F_2$  and  $F_3$  data were combined for the determination of the recombination value by the method suggested by IMMER (1934) as modified by ROBERTSON and COLEMAN (1940) for particular cases.

#### EXPERIMENTAL RESULTS

The experimental results will be presented in three parts—namely, (1) determination of the constitution of the parent material for non-6-row versus 6-row (*Vv*) and for intermedium versus non-intermedium (*Ii*), (2) inheritance of the fertile intermedium condition in Mortoni, and (3) the interrelationships of the factors concerned with lateral spikelet fertility with other factor pairs located in known linkage groups.

#### *Row and intermedium constitution of parental material*

It was first necessary to determine the genetic constitution of the parent material for the non-6-row versus 6-row (*Vv*) and intermedium versus non-

intermedium factor pairs. The various lines studied were crossed on others of known constitution as determined by ROBERTSON (1929, 1937). These testers were: Nigrinudum (*VVII*), Nudideficiens (*VVii*), and Coast II (*vvII*). Nigrinudum is genotypically an infertile intermedium. From crosses with these testers, the factorial compositions of the parental lines were established as follows: Nudihaxtoni, *vvII*; Sublaxum, *VVii*; and Mortoni, *VV*. It was apparent that Mortoni, morphologically a *H. intermedium* variety, has the same composition for the 2-row (*VV*) condition as do some *H. distichon* varieties. It differs from the latter in that it is homozygous for partial fertility of the lateral spikelets. The intermedium versus non-intermedium (*Ii*) condition in Mortoni may not be the same as that in the other lines mentioned.

When the various known factorial constitutions for the row (*Vv*) and intermedium (*Ii*) factor pairs are summarized in the light of their  $F_1$  phenotypic behavior, several facts are immediately apparent. Partial fertility of the lateral spikelets in the  $F_1$  is due to the homozygous dominant intermedium, *II*, factorial condition in the presence of a heterozygous condition for rows, *Vv*. Non-fertility of the lateral spikelets in the  $F_1$  is due to the presence of the heterozygous condition of the intermedium versus non-intermedium (*Ii*) factor pair in the presence of either *VV* or *Vv*. This is indicated in table 2.

TABLE 2  
Fertility of the lateral spikelets in the  $F_1$  generation for various genotypes for rows and intermediums in various crosses.

| CROSS                                                    | FERTILITY CONDITION IN $F_1$ PLANTS |                   |
|----------------------------------------------------------|-------------------------------------|-------------------|
|                                                          | GENOTYPE                            | PHENOTYPE         |
| Nudihaxtoni ( <i>vvII</i> ) × Nigrinudum ( <i>VVII</i> ) | <i>VvII</i>                         | Partial fertility |
| Coast II ( <i>vvII</i> ) × Nigrinudum ( <i>VVII</i> )    | <i>VvII</i>                         | Partial fertility |
| Coast II ( <i>vvII</i> ) × Nudideficiens ( <i>VVii</i> ) | <i>VvIi</i>                         | No fertility      |
| Coast II ( <i>vvII</i> ) × Sublaxum ( <i>VVii</i> )      | <i>VvIi</i>                         | No fertility      |
| Sublaxum ( <i>VVii</i> ) × Nigrinudum ( <i>VVII</i> )    | <i>VVIi</i>                         | No fertility      |

It is obvious that this fertile intermedium condition involves a heterozygous condition for the non-6-row versus 6-row (*Vv*) factor pair and the presence of the homozygous dominant intermedium (*II*) factor. The inheritance of the partially fertile intermedium as a homozygous condition is still to be considered.

*The fertile intermedium condition in Mortoni*

The factor pair for non-6-row versus 6-row (*Vv*) was studied in a cross between Mortoni and Nudihaxtoni. The  $F_1$  plants were fertile intermedi-

ums. The lateral spikelets were 75 to 90 percent fertile, but with no awns or tip-awns on any of the lemmas. Three classes were separable in the  $F_2$  generation—namely, 2-row, partially fertile intermediates, and 6-row. The observed  $F_2$  data were calculated on the basis of a 1:2:1 ratio on the hypothesis that the observed classes could be explained by the non-6-row versus 6-row ( $Vv$ ) factor pair. The data appear in table 3. The observed data afforded a poor fit to the calculated 1:2:1 ratio for non-6-row versus 6-row ( $Vv$ ).

TABLE 3  
*Segregation in the  $F_2$  generation for 2-row versus intermediates versus 6-row ( $Vv$ ) in a cross between Mortoni and Nudihaxtoni.*

| ITEM                   | NUMBER OF PLANTS WITH CHARACTERS INDICATED |               |        |       |
|------------------------|--------------------------------------------|---------------|--------|-------|
|                        | 2-ROW                                      | INTERMEDIATES | 6-ROW  | TOTAL |
| Observed counts        | 117                                        | 390           | 195    | 702   |
| Calculated 1:2:1 ratio | 175.50                                     | 351.00        | 175.50 | 702   |

$$\chi^2 = 26.000 \quad P = 0.000002$$

The observed  $F_2$  data were then calculated on a two-factor basis for the non-6-row versus 6-row ( $Vv$ ) and for the intermediate versus non-intermediate ( $Ii$ ) factor pairs. The data indicate two levels of fertility for intermediate—namely, partially fertile intermediate like the Mortoni parent and infertile intermediate as found in many 2-row sorts. The observed  $F_2$  data, calculated on a two-factor basis with the intermediate condition hypostatic to the 6-row ( $vv$ ) factor, are given in table 4. The observed data afforded a good fit to the calculated 3:9:4 ratio for a two-factor difference.

TABLE 4  
*Segregation in the  $F_2$  generation for non-6-row versus 6-row and for infertile versus fertile intermediate in a Mortoni  $\times$  Nudihaxtoni cross.*

| ITEM                   | NUMBER OF PLANTS WITH CHARACTERS INDICATED |         |        |       |
|------------------------|--------------------------------------------|---------|--------|-------|
|                        | INTERMEDIUM                                |         | 6-ROW  | TOTAL |
|                        | INFERTILE                                  | FERTILE |        |       |
| Observed counts        | 117                                        | 390     | 195    | 702   |
| Calculated 3:9:4 ratio | 131.62                                     | 394.88  | 175.50 | 702   |

$$\chi^2 = 3.8510 \quad P = 0.1484$$

The  $F_2$  data for the fertility of the lateral spikelets can be explained tentatively on the basis of the factor pair for non-6-row versus 6-row ( $Vv$ ) and on the assumption of a single-factor difference for infertile versus fertile intermediate. It appears that an allelic series exists for intermediate. The



intermedium condition, reported by ROBERTSON (1929), has non-fertile lateral spikelets and has been designated as *II*, while the non-intermedium allele has been designated as *ii*. Varieties with either factor pair in the homozygous condition are morphologically 2-rowed sorts in that they have only one fertile spikelet per rachis joint. Another allele found in the Mortoni parent, which breeds true for fertility on many lateral spikelets, will be designated as fertile intermedium (*I<sup>h</sup>I<sup>h</sup>*). This allele appears to be similar to the *BB* factorial condition found in the homozygous intermedium, Haxtoni (*aaBB*), reported by HARLAN and HAYES (1920). The infertile intermedium condition is dominant over partial fertility. All intermediums are genotypically *VV*. The cross, Mortoni (*VVI<sup>h</sup>I<sup>h</sup>*) × Nudihaxtoni (*vvII*), would be expected to segregate as follows in the F<sub>2</sub> and F<sub>3</sub> generations:

| GENOTYPE                            | FREQUENCY | F <sub>2</sub> PHENOTYPES | RATIO | BEHAVIOR IN F <sub>3</sub> GENERATION                                                                                         |
|-------------------------------------|-----------|---------------------------|-------|-------------------------------------------------------------------------------------------------------------------------------|
| <i>VVII</i>                         | 1         | Infertile intermedium     | 3     | Infertile intermedium<br>Segregates 3:1 for infertile vs. fertility                                                           |
| <i>VVI<sup>h</sup>I<sup>h</sup></i> | 2         |                           |       |                                                                                                                               |
| <i>VvII</i>                         | 2         | Fertile intermediate      | 9     | Segregates 1:2:1 for infertile, partial fertility and 6-row<br>Segregates 3:9:4 same as F <sub>2</sub><br>Fertile intermedium |
| <i>VvII<sup>h</sup></i>             | 4         |                           |       |                                                                                                                               |
| <i>VVI<sup>h</sup>I<sup>h</sup></i> | 1         | Fertile intermedium       |       | Segregates 3:1 for fertile intermedium vs. 6-row                                                                              |
| <i>VvI<sup>h</sup>I<sup>h</sup></i> | 2         | Fertile intermediate      |       |                                                                                                                               |
| <i>vvII</i>                         | 1         | 6-row                     | 4     | 6-row full fertility                                                                                                          |
| <i>vvII<sup>h</sup></i>             | 2         |                           |       |                                                                                                                               |
| <i>vvI<sup>h</sup>I<sup>h</sup></i> | 1         |                           |       |                                                                                                                               |

The F<sub>2</sub> plants were grown in the F<sub>3</sub> generation to determine their genotypes. The *VvII* and *VvII<sup>h</sup>* classes, being very difficult to separate in the field, were grouped together. As predicted from the F<sub>2</sub> data, the homozygous partially fertile intermedium (*VVI<sup>h</sup>I<sup>h</sup>*) plants had been grouped with the intermediate class for rows (*Vv*). The observed data presented in table 5 afforded a good fit to the calculated 1:2:1:6:2:4 ratio for independent inheritance of the non-6-row versus 6-row (*Vv*) and infertile versus fertile intermedium (*II<sup>h</sup>*) factor pairs. An allelic series for the intermedium condition is indicated.

To verify the assumption that an allelic series for intermedium is involved, the three intermedium conditions, *II*, *I<sup>h</sup>I<sup>h</sup>*, and *ii*, were tested in crosses which involved all possible combinations of these factors.

The inheritance of non-intermedium (*ii*) versus fertile intermedium (*I<sup>h</sup>I<sup>h</sup>*) was studied in crosses between Mortoni (*VVI<sup>h</sup>I<sup>h</sup>*) and other varieties which were *VVii* in constitution. The F<sub>1</sub> plants were non-intermedium with no fertility of the lateral spikelets—that is, the non-intermedium condition was dominant. The F<sub>2</sub> plants were classified as non-intermedium (*VVii* and

TABLE 5

Observed and calculated  $F_2$  genotypes for non-6-row versus 6-row and infertile versus fertile intermedium as determined by the  $F_3$  segregation in a *Mortoni* × *Nudihaxtoni* cross.

| ITEM         | NUMBER OF INDICATED GENOTYPE |                         |                                     |                                          |                                     |        | TOTAL |
|--------------|------------------------------|-------------------------|-------------------------------------|------------------------------------------|-------------------------------------|--------|-------|
|              | <i>VVII</i>                  | <i>VVII<sup>h</sup></i> | <i>VVI<sup>h</sup>I<sup>h</sup></i> | <i>VvII</i> &<br><i>VvII<sup>h</sup></i> | <i>VvI<sup>h</sup>I<sup>h</sup></i> | 6-ROW* |       |
| Obsvd. count | 43                           | 79                      | 36                                  | 289                                      | 82                                  | 173    | 702   |
| Calc. ratio† | 43.88                        | 87.75                   | 43.87                               | 263.25                                   | 87.75                               | 175.50 | 702   |

\* 6-row includes *vvII*, *vvII<sup>h</sup>*, and *vvI<sup>h</sup>I<sup>h</sup>*.

† Compared with a calculated 1:2:1:6:2:4 ratio.  $\chi^2 = 5.2331$ .  $P = 0.3903$ .

*VVII<sup>h</sup>*) and fertile intermedium (*VVI<sup>h</sup>I<sup>h</sup>*). On account of the difficulty in separation of the  $F_2$  classes, seed from the individual  $F_2$  plants was grown in the  $F_3$  generation to obtain the  $F_2$  genotypes, the data for which are given in table 6. The data indicate that non-intermedium (*ii*) versus fertile intermedium (*I<sup>h</sup>I<sup>h</sup>*) is the result of the segregation of a simple Mendelian factor pair.

TABLE 6

Observed and calculated  $F_2$  genotypes for non-intermedium (or 2-row) versus fertile intermedium as determined by the  $F_3$  segregation in crosses between *Mortoni* and other varieties.

| CROSS                                      | NUMBER OF INDICATED GENOTYPE*  |                                          |                                                            |       | $\chi^2$ | P        |
|--------------------------------------------|--------------------------------|------------------------------------------|------------------------------------------------------------|-------|----------|----------|
|                                            | NON-INTER-MEDIUM ( <i>ii</i> ) | HETERO-ZYGOTES ( <i>I<sup>h</sup>i</i> ) | FERTILE INTER-MEDIUM ( <i>I<sup>h</sup>I<sup>h</sup></i> ) | TOTAL |          |          |
| <i>Nudideficiens</i> × <i>Mortoni</i>      | 266                            | 475                                      | 227                                                        | 968   | 3.4774   | 0.1812   |
| <i>Nilsson-Ehle No. 2</i> × <i>Mortoni</i> | 126                            | 256                                      | 118                                                        | 500   | 0.5440   | V. large |
| <i>Sublaxum</i> × <i>Mortoni</i>           | 201                            | 429                                      | 197                                                        | 827   | 1.2007   | 0.5586   |
| <i>Mortoni</i> × <i>Smyrna I</i>           | 24                             | 35                                       | 23                                                         | 82    | 1.7805   | 0.4203   |
| <i>Minnesota 84-7</i> × <i>Mortoni</i>     | 129                            | 225                                      | 101                                                        | 455   | 3.5011   | 0.1791   |

\* Compared with a calculated 1:2:1 ratio.

A *Sublaxum* (*VVii*) × *Nigrinudum* (*VVII*) cross was used to study the inheritance of infertile intermedium versus non-intermedium (*Ii*). The  $F_2$  data, presented in table 7, indicate a single-factor difference, although the fit of the total observed data to the calculated 3:1 ratio was not good. The discrepancy appears to be due to the II-32-149 cross in which the non-intermedium forms were consistently high. This is possibly due to the difficulty of separation of the two classes in the  $F_2$  generation.

*Nigrinudum* (*VVII*) was crossed with *Mortoni* (*VVI<sup>h</sup>I<sup>h</sup>*), the  $F_3$  data for which are presented in table 8. The  $F_2$  data were classified so as to include a few plants with inflated but non-fertile lateral spikelets in the fertile inter-

medium class. (See fig. 2.) This appeared to be justified, since occasional plants of the Mortoni parent fail to show any fertility of the lateral spikelets. The observed data afford a good fit to the calculated 1:2:1 ratio for a monohybrid segregation.

TABLE 7  
*Segregation in the F<sub>2</sub> generation for intermedium and non-intermedium in a Sublaxum × Nigrinudum cross.*

| CROSS NO. | OBSERVED NUMBERS* |                  |       | χ <sup>2</sup> | P      |
|-----------|-------------------|------------------|-------|----------------|--------|
|           | INTER-MEDIUM      | NON-INTER-MEDIUM | TOTAL |                |        |
| II-32- 55 | 262               | 90               | 352   | 0.0606         | 0.8026 |
| -147      | 195               | 81               | 276   | 2.7826         | 0.0949 |
| -148      | 230               | 89               | 319   | 1.4305         | 0.2301 |
| -149      | 239               | 108              | 347   | 6.9404         | 0.0085 |
| -150      | 223               | 87               | 310   | 1.5527         | 0.2113 |
| Totals    | 1149              | 455              | 1604  | 9.6958         | 0.0019 |

\* Compared with a calculated 3:1 ratio.

Since a monohybrid segregation was obtained in crosses with the infertile intermedium (*II*), non-intermedium (*ii*), and fertile intermedium (*I<sup>h</sup>I<sup>h</sup>*) factors taken in all possible combinations, a multiple allelic series is definitely indicated.

TABLE 8  
*Observed and calculated F<sub>2</sub> genotypes for infertile versus fertile intermedium as determined by the F<sub>3</sub> segregation in a Mortoni × Nigrinudum cross.*

| ITEM              | NUMBER OF INDICATED GENOTYPE        |                                                      |                                                           | TOTAL |
|-------------------|-------------------------------------|------------------------------------------------------|-----------------------------------------------------------|-------|
|                   | INFERTILE INTERMEDIUM ( <i>II</i> ) | HETERO-ZYGOTES ( <i>I<sup>h</sup>I<sup>h</sup></i> ) | FERTILE INTERMEDIUM ( <i>I<sup>h</sup>I<sup>h</sup></i> ) |       |
| Observed count    | 101                                 | 202                                                  | 81                                                        | 384   |
| Calc. 1:2:1 ratio | 96                                  | 192                                                  | 96                                                        | 384   |

χ<sup>2</sup>=3.1250    P=0.2122

The data for one Coast II × Mortoni cross indicate that some Coast II plants carry the fertile intermedium allele (*I<sup>h</sup>I<sup>h</sup>*). The F<sub>1</sub> plants in this particular case had fully fertile lateral spikelets with tip awns less than one-half the length of the awns on the central spikelets. The F<sub>2</sub> plants were classified as fertile intermediums, intermediates, and 6-row. All intermediums showed some fertility of the lateral spikelets. The F<sub>2</sub> plants grown in

the  $F_3$  generation showed all intermedium genotypes to have fertile lateral spikelets. The infertile intermedium form was not recovered.

Since the intermedium allelic series is hypostatic to the 6-row ( $vv$ ) condition, it is necessary to determine the intermedium constitution of 6-rowed varieties used in crosses where fertility is being studied genetically. The value of known testers is obvious. An infertile intermedium 2-rowed variety such as Nigrinudum ( $VVII$ ) could be used to test the constitution of unknown 6-rowed and 2-rowed varieties for the intermedium allelic series as follows:

(a) Unknown 6-row ( $vv$ —)  $\times$   $VVII$  gives non-fertile lateral spikelets in  $F_1$  when the 6-rowed variety is  $vvii$ . Non-intermedium forms are recovered in  $F_2$  and  $F_3$ .

(b) Unknown 6-row ( $vv$ —)  $\times$   $VVII$  gives partial lateral spikelet fertility in the  $F_1$  when the 6-rowed variety is either  $vvII$  or  $vvI^hI^h$ . In case it is  $vvII$  the  $F_2$  will segregate into three classes in a 1:2:1 ratio—namely, infertile intermediums, fertile intermediates, and 6-row. This segregation may be verified in the  $F_3$  generation. When the unknown 6-rowed variety is  $vvI^hI^h$ , the  $F_2$  will give infertile intermediums, fertile intermediums and fertile intermediates (indistinguishable), and 6-row. The  $F_3$  segregation will give infertile intermediums and fertile intermediums among the seven phenotypic classes.

(c) The *H. distichon* and *H. deficiens* varieties—that is, morphological 2-rowed varieties, may be crossed with Nigrinudum to determine their constitution for  $II$  or  $ii$ .

#### Factor interrelationships

Mortoni, classified as *H. intermedium* by HARLAN (1918), appears to be genetically  $VVI^hI^h$ . The interrelationships of the partial lateral spikelet fertility factor with others in known linkage groups were studied with the view that the fertility condition was due to another allele, ( $I^hI^h$ ). Two-row non-intermedium ( $VVii$ ) testers were used in the study of interrelationships with the non-intermedium versus fertile intermedium ( $I^hi$ ) factor pair.

#### Characters inherited independently

The various characters inherited independently of the non-intermedium versus fertile intermedium ( $I^hi$ ) factor pair in Mortoni crosses are given in table 9. The  $F_1$  plants in all cases were characterized by infertile lateral spikelets. The  $F_2$  plants were classified for non-intermediums, fertile intermediums, and the other factor pairs studied in particular crosses. Because of the difficulty in classification, the selfed  $F_2$  plants were grown in the  $F_3$  generation to determine the  $F_2$  genotypes.

The segregations in the  $F_3$  generation indicate a good agreement between

TABLE 9

Observed  $F_2$  genotypes for non-intermedium versus fertile intermedium and factors inherited independently as determined by  $F_2$  segregations in crosses of Mortoni with other varieties.

| MORTONI<br>CROSSED<br>WITH: | GENO-<br>TYPE<br>STUDIED | LINK-<br>AGE<br>GROUP | GENOTYPES* |      |      |      |      |      |      |      |      | TOTAL | $\chi^2$ | P      |
|-----------------------------|--------------------------|-----------------------|------------|------|------|------|------|------|------|------|------|-------|----------|--------|
|                             |                          |                       | AABB       | AABb | AAbb | AaBB | AaBb | Aabb | aaBB | aaBb | aabb |       |          |        |
| Minn. 84-7                  | $I^h i F f$              | I                     | 41         | 62   | 26   | 63   | 106  | 56   | 25   | 55   | 21   | 455   | 9.8431   | 0.2772 |
| Nudideficiens               | $I^h i B b$              | II                    | 62         | 127  | 77   | 110  | 232  | 124  | 45   | 117  | 65   | 968   | 9.7934   | 0.2810 |
| N. Ehle No. 2               | $I^h i B b$              | II                    | 31         | 65   | 30   | 55   | 130  | 71   | 26   | 60   | 32   | 500   | 3.4080   | 0.9028 |
| Nudideficiens               | $I^h i N n$              | III                   | 58         | 138  | 70   | 116  | 245  | 114  | 61   | 108  | 58   | 968   | 6.1363   | 0.6322 |
| Nudideficiens               | $I^h i S s$              | V                     | 47         | 60   | 24   | 60   | 135  | 72   | 22   | 59   | 33   | 512   | 14.4610  | 0.0713 |
| Smyrna I                    | $I^h i X s x s$          | VI                    | 9          | 15   | —    | 9    | 26   | —    | 7    | 16   | —    | 82    | 2.8802   | 0.7179 |

\* Compared with calculated 1:2:1:2:4:2:1:2:1 ratio in all cases except Mortoni  $\times$  Smyrna I cross which was compared with calculated 1:2:2:4:1:2 ratio.

the observed data and the calculated ratios for independent inheritance. It appears that the factor pair for non-intermedium versus fertile intermedium ( $I^h i$ ) is inherited independently of factor pairs as follows: Green versus chlorina ( $F f$ ) located in linkage group I, black versus white ( $B b$ ) floral bracts known to be in group II, covered versus naked seeds ( $N n$ ) located in group III, long versus short-haired rachillas ( $S s$ ) previously placed in group V, and green versus xantha seedling color ( $X s X s$ ) known to be in group VI. The non-intermedium versus fertile intermedium ( $I^h i$ ) factor pair was not tested with factors located in group VII.

### Linkage of characters

The interrelationship of the character pairs for non-intermedium versus fertile intermedium ( $I^h i$ ) and hoods versus awns ( $K k$ ) was tested in a cross between Sublaxum and Mortoni. The factor pair for hoods versus awns ( $K k$ ) is known to be located in group IV. The  $F_1$  plants were 2-rowed, hooded, and with non-fertile lateral spikelets. The observed  $F_2$  data for these characters are given in table 10.

The observed data afford a poor fit to the calculated 9:3:3:1 ratio for independent inheritance. It is noted that the non-intermedium awned and fertile intermedium hooded plants are fewer than expected for independent inheritance. These are recombination classes, since the Sublaxum parent was non-intermedium hooded and the Mortoni parent fertile intermedium awned. Linkage in the coupling phase is indicated. The recombination percentage, calculated by the product method, was found to be  $13.12 \pm 1.27$ . The fit of the observed data to the calculated segregation for 13.12 percent recombination is very good. A linkage of the factor pairs for non-intermedium versus fertile intermedium ( $I^h i$ ) and hoods versus awns ( $K k$ ) is indicated. These data verify the hypothesis that an allelic series exists for intermedium—that is,  $I$ ,  $I^h$ , and  $i$ .

TABLE 10

*Segregation in the F<sub>2</sub> generation for non-intermedium versus fertile intermedium and hoods versus awns in a Sublaxum × Mortonii cross.*

| ITEM                              | NUMBER OF PLANTS WITH CHARACTERS INDICATED |        |                                |        | χ <sup>2</sup> | P                 |
|-----------------------------------|--------------------------------------------|--------|--------------------------------|--------|----------------|-------------------|
|                                   | NON-INTERMEDIUM HOODS                      |        | FERTILE INTERMEDIUM HOODS AWNS |        |                |                   |
|                                   | HOODS                                      | AWNS   | HOODS                          | AWNS   |                |                   |
| Observed count                    | 588                                        | 49     | 50                             | 144    | 831            |                   |
| Calc. 9:3:3:1 segregation         | 467.44                                     | 155.81 | 155.81                         | 51.94  | 831            | 339.3392 V. small |
| Calc. 13.12 percent recombination | 572.31                                     | 50.94  | 50.94                          | 156.81 | 831            | 1.5678 0.6713     |

The data for the F<sub>2</sub> phenotypes and F<sub>2</sub> genotypes from the 9:3:3 classes in F<sub>2</sub> were combined for the calculation of linkage by use of the formulae suggested by IMMER (1934). The formula for the calculation of linkage intensities for F<sub>2</sub> genotypes as determined from the segregation for the 9:3:3 F<sub>2</sub> phenotypic classes is as follows:<sup>4,5</sup>

$$\frac{2e+f+g+k+m}{p} - \frac{f+g+2j+k+2l+m}{1-p} + \frac{2(j+k+l+m)p}{1-p^2} - \frac{2(h+i)(1-2p)}{1-2p+2p^2} - \frac{2(e+f+g+h+i)p}{2+p^2} = 0.$$

The information in F<sub>3</sub> for n plants is:

$$\frac{4n(6-10p+5p^2-4p^3+20p^4+2p^5+2p^6)}{p(1-p)(1+p)^2(2+p^2)^2(1-2p+2p^2)}$$

The recombination value for the combined F<sub>2</sub> phenotypes and genotypes was found to be 14.32 ± 0.61 percent. The observed data for the F<sub>2</sub> genotypes as determined from the F<sub>3</sub> segregation are given in table 11.

The F<sub>3</sub> data gave a good fit to the calculated ratio with 14.32 percent recombination, which indicates that the non-intermedium versus fertile intermedium (*I<sup>h</sup>i*) and hoods versus awns (*Kk*) factor pairs are in linkage group IV.

<sup>4</sup> Modification for 9:3:3 class worked out by O. H. COLEMAN, COLORADO EXPERIMENT STATION.

<sup>5</sup> Symbols used to designate the observed frequency of occurrence of individuals in various genotypes:

|    | AA | Aa | aa |
|----|----|----|----|
| BB | e  | f  | l  |
| Bb | g  | h  | i  |
| bb | j  | k  | n  |

TABLE II

Fit of  $F_2$  genotypes in a *Mortoni* × *Sublaxum* cross to a calculated ratio with 14.32 percent recombination.

| ITEM                              | NUMBER OF PLANTS OF INDICATED GENOTYPE |             |            |                         |                         |                         |                                     |                                     | TOTAL |
|-----------------------------------|----------------------------------------|-------------|------------|-------------------------|-------------------------|-------------------------|-------------------------------------|-------------------------------------|-------|
|                                   | <i>iiKK</i>                            | <i>iiKk</i> | <i>ikk</i> | <i>I<sup>h</sup>iKK</i> | <i>I<sup>h</sup>iKk</i> | <i>I<sup>h</sup>ikk</i> | <i>I<sup>h</sup>I<sup>h</sup>KK</i> | <i>I<sup>h</sup>I<sup>h</sup>Kk</i> |       |
| Observed count                    | 153                                    | 44          | 2          | 57                      | 33 <sup>1</sup>         | 43                      | 6                                   | 46                                  | 682   |
| Calc. 14.32 percent recombination | 153.30                                 | 51.24       | 4.28       | 51.25                   | 315.16                  | 51.24                   | 4.28                                | 51.25                               | 682   |
| $\chi^2=6.2335$                   | $n^1=8$                                | $P=0.5139$  |            |                         |                         |                         |                                     |                                     |       |

DISCUSSION OF RESULTS

The results of this study indicate that partially fertile intermediates obtained in the  $F_1$  generation from 2-row and 6-row barley crosses are heterozygous for the non-6-row versus 6-row (*Vv*) factor pair and homozygous dominant for infertile intermedium (*II*). The complete lack of lateral spikelet fertility found in  $F_1$  plants apparently results when the non-6-row condition (*VV* or *Vv*) is present with the infertile intermedium versus non-intermedium factor pair in the heterozygous condition (*Ii*).

Some varieties of barley classified as *Hordeum intermedium* have partial fertility of the lateral spikelets that breeds true. This was found to be true of *Mortoni* (C.I. 2210). The results of this investigation indicate *Mortoni* to be a fertile intermedium (*VVI<sup>h</sup>I<sup>h</sup>*) barley with 10 to 50 percent of the lateral spikelets generally fertile. The data obtained indicate that partial lateral spikelet fertility in *Mortoni* is due to another allele of the infertile intermedium versus non-intermedium (*Ii*) factor pair which has been designated as fertile intermedium (*I<sup>h</sup>I<sup>h</sup>*). The allelic series for intermedium has been established as *I*, *I<sup>h</sup>*, and *i*. These three intermedium conditions (*II*, *I<sup>h</sup>I<sup>h</sup>*, and *ii*) were tested in crosses of parents that carry these factors in all possible combinations. A monohybrid segregation was obtained in each case, a condition necessary for multiple alleles. Non-fertility appeared to be dominant over fertility in every instance. The intermedium allelic series, together with the expected classes in crosses between 6-rowed and 2-rowed barley varieties, in the  $F_3$  generation, may be summarized as follows:

While a single factor appeared to explain the fertility condition found in *Mortoni*, it was also observed that environmental conditions influence fertility to some extent. In crosses of *Mortoni* with some 6-rowed varieties, it was also evident that minor modifying factors possibly influence fertility of the lateral spikelets. Fertility of the lateral spikelets was more evident in space-planted  $F_2$  rows than in drilled  $F_3$  rows. Some plants genetically fertile failed to develop fertility in thick stands in the drilled rows. In studies of the intermedium series, it is recommended that the selfed  $F_2$

| CLASS | PHENOTYPIC CLASSES                             | F <sub>2</sub> GENOTYPES                 |                                   |                                                                               |   |                                                                              |    |
|-------|------------------------------------------------|------------------------------------------|-----------------------------------|-------------------------------------------------------------------------------|---|------------------------------------------------------------------------------|----|
|       |                                                | <i>Ii</i>                                | <i>II<sup>h</sup></i>             | <i>I<sup>h</sup>i</i>                                                         |   |                                                                              |    |
|       |                                                |                                          | (From F <sub>3</sub> Segregation) |                                                                               |   |                                                                              |    |
| 1.    | 6-rowed*                                       | <i>vvII</i><br><i>vvIi</i><br><i>vvi</i> | 4                                 | <i>vvII</i><br><i>vvI<sup>h</sup>I</i><br><i>vvI<sup>h</sup>I<sup>h</sup></i> | 4 | <i>vvI<sup>h</sup>I<sup>h</sup></i><br><i>vvI<sup>h</sup>i</i><br><i>vvi</i> | 4  |
| 2.    | 6-rowed, intermediates, intermediums           |                                          |                                   |                                                                               |   |                                                                              |    |
|       | (a) Fertile intermediums                       | —                                        |                                   | <i>VvI<sup>h</sup>I<sup>h</sup></i>                                           |   | <i>VvI<sup>h</sup>I<sup>h</sup></i>                                          | 2‡ |
|       | (b) Infertile intermediums                     | <i>VvII</i>                              | 2                                 | <i>VvII</i>                                                                   | 2 | —                                                                            |    |
|       | (c) Fertile and infertile intermediums         | —                                        |                                   | <i>VvI<sup>h</sup></i>                                                        | 4 | —                                                                            |    |
| 3.    | 6-rowed, intermediates, intermediums, 2-rowed† |                                          |                                   |                                                                               |   |                                                                              |    |
|       | (a) Fertile intermediums                       | —                                        |                                   | —                                                                             |   | <i>VvI<sup>h</sup>i</i>                                                      | 4‡ |
|       | (b) Infertile intermediums                     | <i>VvIi</i>                              | 4                                 | —                                                                             |   | —                                                                            |    |
| 4.    | 6-rowed, intermediates, 2-rowed                | <i>Vvii</i>                              | 2                                 | —                                                                             |   | <i>Vvii</i>                                                                  | 2‡ |
| 5.    | Intermediums                                   |                                          |                                   |                                                                               |   |                                                                              |    |
|       | (a) Fertile intermediums                       | —                                        |                                   | <i>VVI<sup>h</sup>I<sup>h</sup></i>                                           | 1 | <i>VVI<sup>h</sup>I<sup>h</sup></i>                                          | 1  |
|       | (b) Infertile intermediums                     | <i>VVII</i>                              | 1                                 | <i>VVII</i>                                                                   | 1 | —                                                                            |    |
|       | (c) Fertile and infertile intermediums         | —                                        |                                   | <i>VVI<sup>h</sup>I</i>                                                       | 2 | —                                                                            |    |
| 6.    | Intermediums and 2-rowed                       |                                          |                                   |                                                                               |   |                                                                              |    |
|       | (a) Fertile intermediums                       | —                                        |                                   | —                                                                             |   | <i>VVI<sup>h</sup>i</i>                                                      | 2  |
|       | (b) Infertile intermediums                     | <i>VVIi</i>                              | 2                                 | —                                                                             |   | —                                                                            |    |
| 7.    | 2-rowed                                        | <i>VVii</i>                              | 1                                 | —                                                                             |   | <i>VVii</i>                                                                  | 1  |

\* The 6-row (*vv*) factor is epistatic to the intermedium alleles (*I*, *I<sup>h</sup>*, and *i*). These genotypes are never observed.

† Two-rowed is considered here as *VVii*.

‡ Segregation not actually observed.

plants of the fertile intermedium class be space-planted in the F<sub>3</sub> generation to permit the most favorable environmental conditions for the development of fertility of the lateral spikelets. This is particularly desirable for crosses like Mortoni × Nigrinudum that involve segregation of the infertile versus fertile intermedium (*II<sup>h</sup>*) factor pair. In this cross it was difficult to distinguish between the homozygous fertile intermedium (*I<sup>h</sup>I<sup>h</sup>*) rows and those heterozygous for the infertile and fertile condition (*II<sup>h</sup>*).

The non-intermedium versus fertile intermedium (*I<sup>h</sup>i*) factor pair appeared to be linked with that for hoods versus awns (*Kk*) located in group IV with a recombination value of  $14.32 \pm 0.61$  percent as determined from the combined F<sub>2</sub> phenotypes and genotypes. Such a linkage would be expected on the hypothesis of an allelic series for intermedium.

From the evidence available, it appears that there has been a change in the use of the term intermedium from its original form. HARLAN and HAYES



(1920) indicated that their homozygous intermedium barley, Haxtoni, designated by them as *aaBB*, had lateral spikelet fertility that averaged from 17.8 to 54.6 percent in different  $F_3$  progeny lines. It seems reasonable to conclude that this is the intermedium described by students of barley classification. The intermedium factor ( $I^hI^h$ ) defined in this paper appears to be similar to the *BB* factor reported by HARLAN and HAYES (1920). The fertile intermedium condition in Mortoni ( $VVI^hI^h$ ) is probably identical with that described for the homozygous intermedium, Haxtoni. Homozygous fertile segregates were obtained in the  $F_3$  generation for various crosses of Mortoni with both 2-rowed and 6-rowed varieties. The establishment of an allelic series for intermedium (*I*,  $I^h$ , and *i*) removes the confusion that has prevailed in the interpretation of the various intermedium conditions.

## SUMMARY

A study was made to determine the inheritance of fertility in the lateral spikelets of the Mortoni variety of barley classified as *H. intermedium*.

The fertile intermedium condition found in the  $F_1$  generation in crosses between some 2-row and 6-row barleys is due to the genetic constitution  $VvII$ .

Homozygous partial lateral spikelet fertility found in the Mortoni variety appeared to be due to a fertility allele of the infertile intermedium versus non-intermedium (*Ii*) factor pair. The allelic series for intermedium appears to be *I*,  $I^h$ , and *i*, with infertility dominant over fertility.

The non-intermedium versus fertile intermedium ( $I^hi$ ) factor pair, from the combined  $F_2$  and  $F_3$  data, was found to be linked with that for hoods versus awns (*Kk*) with  $14.32 \pm 0.61$  percent recombination. Hoods versus awns (*Kk*) is known to be located in group IV. The non-intermedium versus fertile intermedium ( $I^hi$ ) factor pair was found to be inherited independently of factors known to be located in groups I, II, III, V, and VI. It was not tested with factors in group VII.

A method of testing barley varieties for intermedium constitution is suggested.

## LITERATURE CITED

- BUCKLEY, G. F. H., 1930 Inheritance in barley with special reference to the color of caryopsis and lemma. *Sci. Agric.* **10**: 460-492.
- DAANE, A., 1931 Linkage relations in barley. *Minn. Tech. Bull.* No. 78.
- ENGLEDOW, F. L., 1920 Inheritance in barley. I. The lateral florets and the rachilla. *J. Genet.* **10**: 93-108.
- 1924 Inheritance in barley. III. The awn and the lateral floret: Fluctuation: A linkage: Multiple allelomorphs. *J. Genet.* **14**: 49-87.
- FISHER, R. A., 1934 *Statistical methods for research workers*. 5th edition. Edinburgh: Oliver and Boyd.
- GILLIS, M. C., 1926 Genetical study of the lateral florets of the barley spike. *J. Agric. Res.* **32**: 367-390.

- GRIFFEE, F., 1925 Correlated inheritance of botanical characters in barley and manner of reaction to *Helminthosporium sativum*. J. Agric. Res. **30**: 915-935.
- HARLAN, H. V., 1918 The identification of varieties of barley. Bull. U. S. Dept. Agric. No. 622.
- HARLAN, H. V., and H. K. HAYES, 1920 Occurrence of the fixed intermedium, *Hordeum intermedium haxtoni*, in crosses between *H. vulgare pallidum* and *H. distichon palmella*. J. Agric. Res. **19**: 575-591.
- HARLAN, H. V., and M. L. MARTINI, 1935 The lateral flowers of two-rowed barley. J. Hered. **26**: 109-113.
- HAYES, H. K., and R. J. GARBER, 1927 Breeding crop plants. 2nd edition. New York: McGraw-Hill.
- HOR, K. S., 1924 Interrelations of genetic factors in barley. Genetics **9**: 151-180.
- IMMER, F. R., 1930 Formulae and tables for calculating linkage intensities. Genetics **15**: 81-98.
- 1934 Calculating linkage intensities from F<sup>3</sup> data. Genetics **19**: 119-136.
- KUCKUCK, H. VON, 1930a Die Genetik der Gerste. Der Züchter **2**: 50-60.
- 1930b Versuch einer Vorläufigen Chromosomentopographie bei Gerste. Der Züchter **3**: 68-72.
- NEATBY, K. W., 1929 Analysis of the inheritance of quantitative characters and linkage in barley. Sci. Agric. **9**: 701-718.
- ROBERTSON, D. W., 1929 Linkage studies in barley. Genetics **14**: 1-36.
- 1933 Inheritance in barley. Genetics **18**: 148-158.
- 1937 Inheritance in barley. II. Genetics **22**: 443-451.
- 1939 Genetics of barley. J. Amer. Soc. Agron. **31**: 273-283.
- ROBERTSON, D. W., G. W. DEMING, and D. KOONCE, 1932 Inheritance in barley. J. Agric. Res. **44**: 445-466.
- ROBERTSON, D. W., and O. H. COLEMAN, 1940 The addition of two factor pairs for chlorophyll deficient seedlings to the linkage groups of barley. J. Genet. **34**: 401-410.
- ROBERTSON, D. W., G. A. WIEBE, and F. R. IMMER, 1941 A summary of linkage studies in barley. J. Amer. Soc. Agron. **33**: 47-64.
